# Supplementary material for: Novel rigid-rod 2,6-diphenylbenzo[1,2-d:4,5-d′]bisthiazole (DPBBT) derivatives for second-order nonlinear optical chromophores
Source: Royal Society of Chemistry journal article supplement (doi:10.1039/b202632e), 2002-01-01
Supplement: b202632e.doc [file b202632e.doc]

Supplementary data

Novel rigid-rod 2,6-diphenylbenzo[1,2-d:4,5-d’]bisthiazole (DPBBT) derivatives for second-order nonlinear optical chromophores

Seung-Hwan Lee,* Akira Otomo, Tatsuo Nakahama, Toshiki Yamada, Toshiya Kamikado, Shiyoshi Yokoyama and Shinro Mashiko

*Kansai Advanced Research Center, Communications Research Laboratory, Nanotechnology Group, Kobe 651-2492, Japan*

The synthesis of **1** was performed by using a published procedure (T. Hattri, K. Kagawa, M.; M. Kakimoto and Y. Imai, *Macromolecules*, 1993, **26**, 4089). Addition of benzoyl chloride (5.2 mmol) containing acceptor groups to **1** (5.0 mmol) with triethylamine (5.2 mmol) in N-methyl-2-pyrrolidone (NMP) solution led to the formation of **2** and **3**.All of the by-products were benzoylated dimer. A 4-dialkylamino benzoyl chloride was obtained by using the acid chloride of a 4-dialkylamino benzoic acid. The precursors **4b**-**6b** were also prepared by a method similar to that of **2-3**, that is, the addition of benzoyl chloride containing donor groups to **2-3** with triethylamine in an NMP solution. Cyclization of the amide compounds **5b**-**6b** using P2O5 in methanesulfonic acid under argon gives the desired rigid-rod *p-*DPBBT chromophores **6a**-**7a**.

**2,5-Bis[(2-cyanoethyl)thio]-N-(4-nitrobenzoyl)-1,4-phenylenediamine. 3**

Et3N (0.52 g, 5.2 mmol) was added to a stirred solution of **1** (1.39 g, 5 mmol) as the acceptor in 10 mL of NMP at room temperature under argon. To this solution, 4-nitrobenzoyl chloride (0.96 g, 5.2 mmol) as the compound containing the acceptor group in 10 mL of NMP was slowly added dropwise with vigorous stirring at 0°C under argon. The mixture was stirred for 6 hr from 0°C (4 hr) to room temperature. The product was isolated by pouring the solution in to 500 mL of water. Recrystallization from CH2Cl2 afforded 0.39 g (91%) of pure **3** as red powder: 1H and 13C NMR (DMSO-*d*6) **: 2.69 (t, 2H, *J* = 7.1 Hz), 2.79 (t, 2H, *J* = 6.6 Hz), 2.98 (t, 2H, *J* = 7.1 Hz), 3.10 (t, 2H, *J* = 6.6 Hz), 5.56 (s, 2H), 6.88 (s, H), 7.27 (s, H), 8.18 (d, 2H, *J* = 8.8 Hz), 8.36 (d, 2H, *J* = 8.8 Hz), 10.10 (s, 1H); 17.98, 29.01, 112.30, 114.18, 119.77, 124.15, 125.24, 129.63, 134.98, 135.10, 140.56, 149.60, 149.74, 164.81. MS *m/z* ESI: simulated: 427.08, exp. 450.90 (M+Na)+.

**2,5-Bis[(2-cyanoethyl)thio]-N-(4-cyanobenzoyl)-1,4-phenylenediamine. 2**

**2** wasprepared by the same procedure as above except that 4-cyanobenzoyl chloride was used as the compound containing the acceptor. Recrystallization from CH2Cl2 afforded 0.34 g (83%) of pure **2** as light green powder: 1H and 13C NMR (DMSO-*d*6) **: 2.68 (t, 2H, *J* = 7.2 Hz), 2.78 (t, 2H, *J* = 6.6 Hz), 2.97 (t, 2H, *J* = 7.1 Hz), 3.10 (t, 2H, *J* = 6.6 Hz), 5.55 (s, 2H), 6.87 (s, H), 7.26 (s, H), 8.01 (d, 2H, *J* = 8.8 Hz), 8.10 (d, 2H, *J* = 8.8 Hz), 10.01 (s, 1H); 17.98, 29.51, 112.28, 114.17, 114.40, 118.90, 119.75, 125.28, 128.95, 129.10, 133.06, 133.17, 135.03, 138.88, 149.56, 165.01. MS *m/z* ESI: simulated: 407.09, exp. 430.90 (M+Na)+.

**2,5-Bis[(2-cyanoethyl)thio]-N-(*p*-dimethylaminobenzoyl)-N'-(*p*-nitrobenzoyl)-*p*-phenylenediamine. 5b**

Et3N (0.61 g, 6 mmol) was added to a stirred solution of **3** (2.57 g, 5 mmol) as the acceptor in 20 mL of NMP at room temperature under argon.To this solution, 4-dimethylamino benzoyl chloride (1.10 g, 6 mmol) as the compound containing the donor group in 10 mL of NMP was slowly added dropwise with vigorous stirring at 0°C under argon. The mixture was stirred overnight (16 h) from 0°C to room temperature. The product was isolated by pouring the solution into 900 mL of water. Recrystallization from acetone afforded 2.65 g (95%) of pure **5b** as yellow powder: 1H and 13C NMR (DMSO-*d*6) **: 2.78 (t, 2H, *J* = 6.6 Hz), 2.80 (t, 2H, *J* = 6.6 Hz), 3.01 (s, 6H), 3.18 (t, 2H, *J* = 7.2 Hz), 3.19 (t, 2H, *J* = 7.2 Hz), 6.78 (d, 2H, *J* = 9.4 Hz), 7.64 (s, 1H), 7.82 (s, 1H), 7.87 (d, 2H, *J* = 8.8 Hz), 8.23 (d, 2H, *J* = 8.3 Hz), 8.40 (d, 2H, *J* = 8.8 Hz), 9.65 (s, 1H), 10.43 (s, 1H); 17.83, 29.49, 42.15, 111.48, 119.65, 124.24, 127.05, 128.56, 129.73, 131.40, 134.58, 137.67, 140.26, 149.91, 153.14, 164.69, 165.68. MS *m/z* ESI: simulated: 574.15, exp. 597.70 (M+Na)+.

**2,5-Bis[(2-cyanoethyl)thio]-N-(*p*-dimethylaminobenzoyl)-N'-(*p*-nitrobenzoyl)-*p*-phenylenediamine. 4b**

**4b** wasprepared by the same procedure as above except that **2** was used as the compound containing the acceptor group: 1H and 13 NMR (DMSO-*d*6) **: 2.76 (t, 2H, *J* = 6.6 Hz), 2.80 (t, 2H, *J* = 6.6 Hz), 3.01 (s, 6H), 3.16 (t, 2H, *J* = 7.2 Hz), 3.18 (t, 2H, *J* = 7.2 Hz), 6.78 (d, 2H, *J* = 8.8 Hz), 7.63 (s, 1H), 7.81 (s, 1H), 7.87 (d, 2H, *J* = 8.8 Hz), 8.05 (d, 2H, *J* = 8.2 Hz), 8.15 (d, 2H, *J* = 8.2 Hz), 9.65 (s, 1H), 10.34 (s, 1H); 17.81, 29.48, 41.26, 111.46, 118.88, 119.56, 120.66, 127.03, 128.57, 129.09, 129.66, 133.15, 134.62, 137.60, 153.15, 164.92, 165.67. MS *m/z* ESI: simulated: 554.16, exp. 577.60 (M+Na)+.

**2,5-Bis[(2-cyanoethyl)thio]-N-(*p*-diethylaminobenzoyl)-N'-(*p*-nitrobenzoyl)-*p*-phenylenediamine. 6b**

**6b** wasprepared by the same procedure as above except that 4-diethylamino benzoyl chloride was used as the compound containing the donor group: 1H and 13C NMR (DMSO-*d*6) **: 1.13 (t, 6H, *J* = 7.2 Hz), 2.77 (t, 2H, *J* = 6.6 Hz), 2.80 (t, 2H, *J* = 6.6 Hz), 3.17 (t, 2H, *J* = 7.1 Hz), 3.19 (t, 2H, *J* = 7.1 Hz), 3.42 (d, 2H, *J* = 6.6 Hz), 3.43 (t, 2H, *J* = 6.6 Hz), 6.74 (d, 2H, *J* = 8.8 Hz), 7.64 (s, 1H), 7.83 (s, 1H), 7.84 (d, 2H, *J* = 9.3 Hz), 8.24 (d, 2H, *J* = 8.2 Hz), 8.40 (d, 2H, *J* = 8.2 Hz), 9.60 (s, 1H), 10.43 (s, 1H); 12.93, 17.83, 29.50, 44.35, 110.82, 119.68, 124.24, 126.82, 128.31, 129.89, 131.45, 134.42, 137.76, 140.23, 149.88, 150.57, 164.71, 165.65. MS *m/z* ESI: simulated: 602.18, exp. 625.60 (M+Na)+.

**2(4-Dimethylaminophenyl)-6-(4-nitrophenyl)benzo(1,2-*d*:4,5-*d'*)bisthiazole. 5a**

Precursor **5b** (0.57 g, 1 mmol) was added to a stirred solution of 0.4 g of P2O5 in 2 mL of methanesulfonic acid at room temperature under argon. The mixture was heated at 80°C for 12 h, 100°C for 12 h and 120°C for a further 12 h. The solution was cooled to room temperature and poured into ice water. The solid mixture was neutralized with saturated aqueous NaHCO3. The resulting precipitate was collected by filtration and washed with water/methanol. The crude product was purified by recrystallization from dimethylsulfoxide (DMSO) to give the required chromophore 0.16 g (38%): 1H and 13C NMR (CF3COOD) **: 3.61 (s, 6H), 8.11 (d, 2H, *J* = 7.7 Hz), 8.44 (d, 2H, *J* = 8.8 Hz), 8.51 (d, 2H, *J* = 7.7 Hz), 8.65 (d, 2H, *J* = 8.8 Hz), 9.22 (s, 1H), 9.29 (s, 1H); 47.01, 114.31, 122.41, 125.15, 129.37, 129.84, 131.42, 132.89, 133.20, 134.32, 143.05, 144.70, 146.85, 151.20, 175.29. MS *m/z* MALDI-TOF (HABA matrix): simulated: 432.07, exp. 431.34 (M+-2CH3).

**2(4-Diethylaminophenyl)-6-(4-nitrophenyl)benzo(1,2-*d*:4,5-*d'*)bisthiazole. 6a**

**6a** wasprepared by the same procedure as above except that **6b** was used as the precursor: 1H and 13C NMR (CF3COOD) **: 1.41 (t, 3H, *J* = 7.2 Hz), 1.42 (t, 3H, *J* = 6.6 Hz), 3.97 (t, 2H, *J* =7.2 Hz), 3.99 (t, 2H, *J* = 6.6 Hz), 8.16 (m, 2H, *J* = 6.6 Hz), 8.59 (m, 2H, *J* = 6.6 Hz), 8.70 (m, 2H, *J* = 6.6 Hz), 8.78 (m, 2H, *J* = 6.6 Hz), 9.24 (d, 1H, *J* = 6.0 Hz), 9.43 (d, 1H, *J*= 6.0 Hz); 9.06, 55.42, 114.46, 124.17, 125.17, 129.86, 131.48, 132.87, 133.33, 134.29, 141.92, 143.27, 144.68, 151.23, 175.12, 175.38. MS *m/z* ESI: simulated: 460.10, exp. 461.20 (M+H)+.

**2(4-Dimethylaminophenyl)-6-(4-carbamoylphenyl)benzo(1,2-*d*:4,5-*d'*)bisthiazole**. **4**

**4**　wasprepared by the same procedure as above except that **4b** was used as the precursor: 1H and 13C NMR (CF3COOD) **: 3.62 (s, 6H), 8.20 (d, 2H, *J* = 9.0 Hz), 8.47 (d, 2H, *J* = 8.7 Hz), 8.53 (d, 2H, *J* = 8.7 Hz), 8.62 (d, 2H, *J* = 8.7 Hz), 9.35 (s, 1H), 9.37 (s, 1H); 47.00, 114.11, 122.31, 129.23, 129.69, 129.96, 131.44, 132.60, 134.17, 137.47, 141.75, 144.18, 146.73, 172.71, 175.54, 176.95. MS *m/z* MALDI-TOF (HABA matrix): simulated: 430.09, exp. 429.70 (M+-2CH3).
